# Supplementary material
Source: publisher site journal article supplement (https://www.dovepress.com/article/430967)
Supplement: Supplementary file 1 [file get_supplementary_file.php]

**Supplementary data**

**ORIGINAL RESEARCH**

**Shi et al**

**Single-cell profiling of tumor-associated neutrophils in advanced non-small cell lung cancer**

Jinpeng Shi1*, Jiayu Li1*, Haowei Wang1*, Xuefei Li2, Qi Wang1, Chao Zhao2, Lei Cheng2, Ruoshuang Han1, Peixin Chen1, Haoyue Guo1, Zhuoran Tang1, Caicun Zhou1, Zhemin Zhang1, Fengying Wu1

1Department of Medical Oncology, Shanghai Pulmonary Hospital & Thoracic Cancer Institute, School of Medicine, Tongji University, Shanghai, China; 2Department of Lung Cancer and Immunology, Shanghai Pulmonary Hospital, School of Medicine, Tongji University, Shanghai, China

*These authors contributed equally to this work

**Supplementary Table 1** Details of the clinicopathological characteristics of enrolled patients (*n* = 9)

| **Case** | **Sex** | **Age** | **Smoking history** | **ECOG PS** | **Histology** | **Stage** | **Gene alteration** | **Previous treatment#** |
| --- | --- | --- | --- | --- | --- | --- | --- | --- |
| P1 | Male | 55 | Smoker | 1 | LUSC | recurrent | WT | 0 |
| P2 | Male | 67 | Non-smoker | 1 | LUSC | IIIB | WT | 0 |
| P3 | Female | 52 | Non-smoker | 1 | LUSC | IVB | WT | 0 |
| P4 | Male | 68 | Smoker | 1 | LUSC | IVA | WT | 2 |
| P5 | Male | 70 | Smoker | 2 | LUAD | IIIC | 19del | 0 |
| P6 | Male | 40 | Smoker | 1 | LUSC | IVA | NA | 0 |
| P7 | Female | 71 | Non-smoker | 1 | LUSC | IVA | L585R | 0 |
| P8 | Male | 62 | Smoker | 1 | LUSC | IIIB | NA | 0 |
| P9 | Male | 64 | Non-smoker | 1 | LUAD | IVB | WT | 0 |

ECOG PS, Eastern Cooperative Oncology Group performance status; LUSC, lung squamous cell carcinoma; LUAD, lung adenocarcinoma; WT, wild type; NA, not assessed.

**Supplementary Table 2** Cell numbers of each patient for neutrophil subtypes in Figures 2B–C

| **Category** | **P1** | **P2** | **P3** | **P4** | **P5** | **P6** | **P7** | **P8** | **P9** |
| --- | --- | --- | --- | --- | --- | --- | --- | --- | --- |
| **N1** | 47 | 10 | 150 | 87 | 16 | 15 | 103 | 61 | 16 |
| **N2** | 7 | 8 | 0 | 77 | 2 | 60 | 222 | 8 | 5 |
| **N3** | 17 | 8 | 19 | 96 | 0 | 45 | 117 | 11 | 2 |
| **N4** | 10 | 8 | 13 | 28 | 6 | 44 | 125 | 13 | 3 |
| **N5** | 5 | 16 | 83 | 59 | 10 | 3 | 39 | 20 | 15 |
| **N6** | 3 | 2 | 6 | 10 | 0 | 9 | 34 | 16 | 1 |
| **N7** | 0 | 0 | 0 | 3 | 0 | 1 | 26 | 0 | 0 |
| **Total** | 89 | 52 | 271 | 360 | 34 | 177 | 666 | 129 | 42 |

Pts, patients; Subs, subtypes.


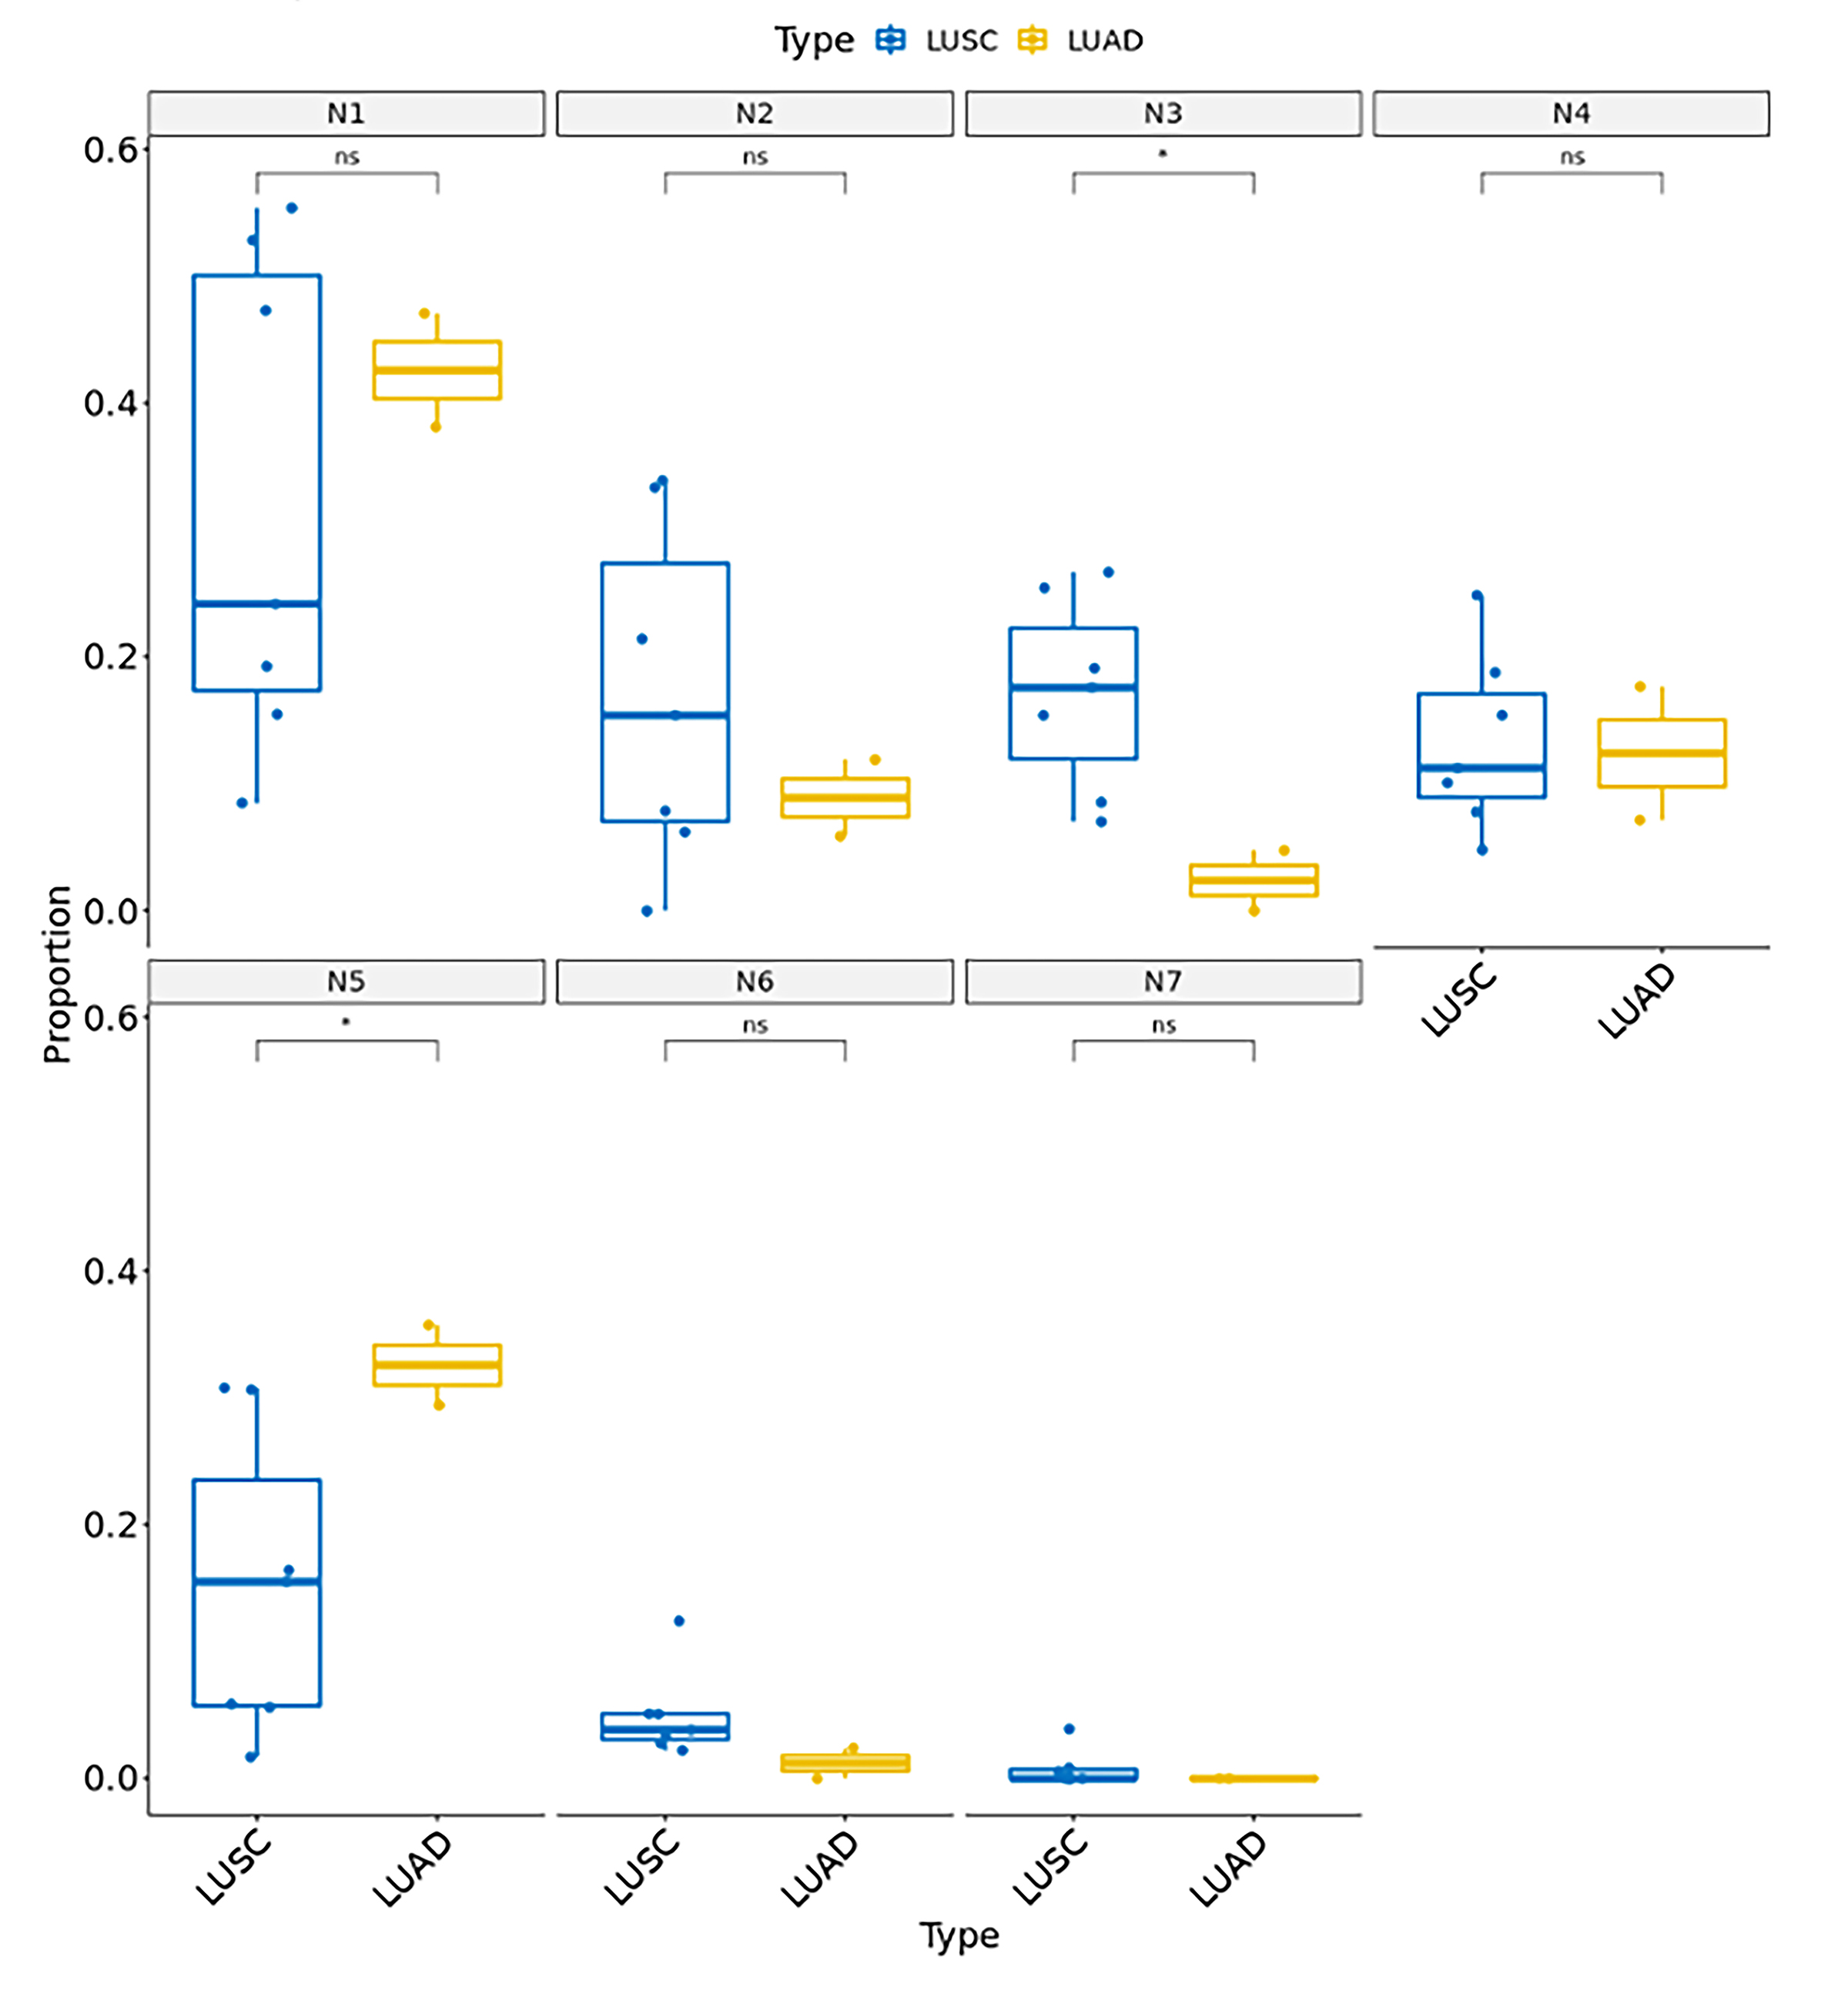


**Supplementary Figure 1** Composition analysis of neutrophil subtypes in different patient groups divided by histology. LUSC, lung squamous cell carcinoma; LUAD, lung adenocarcinoma; ns, not significant; *, *P* < 0.05.


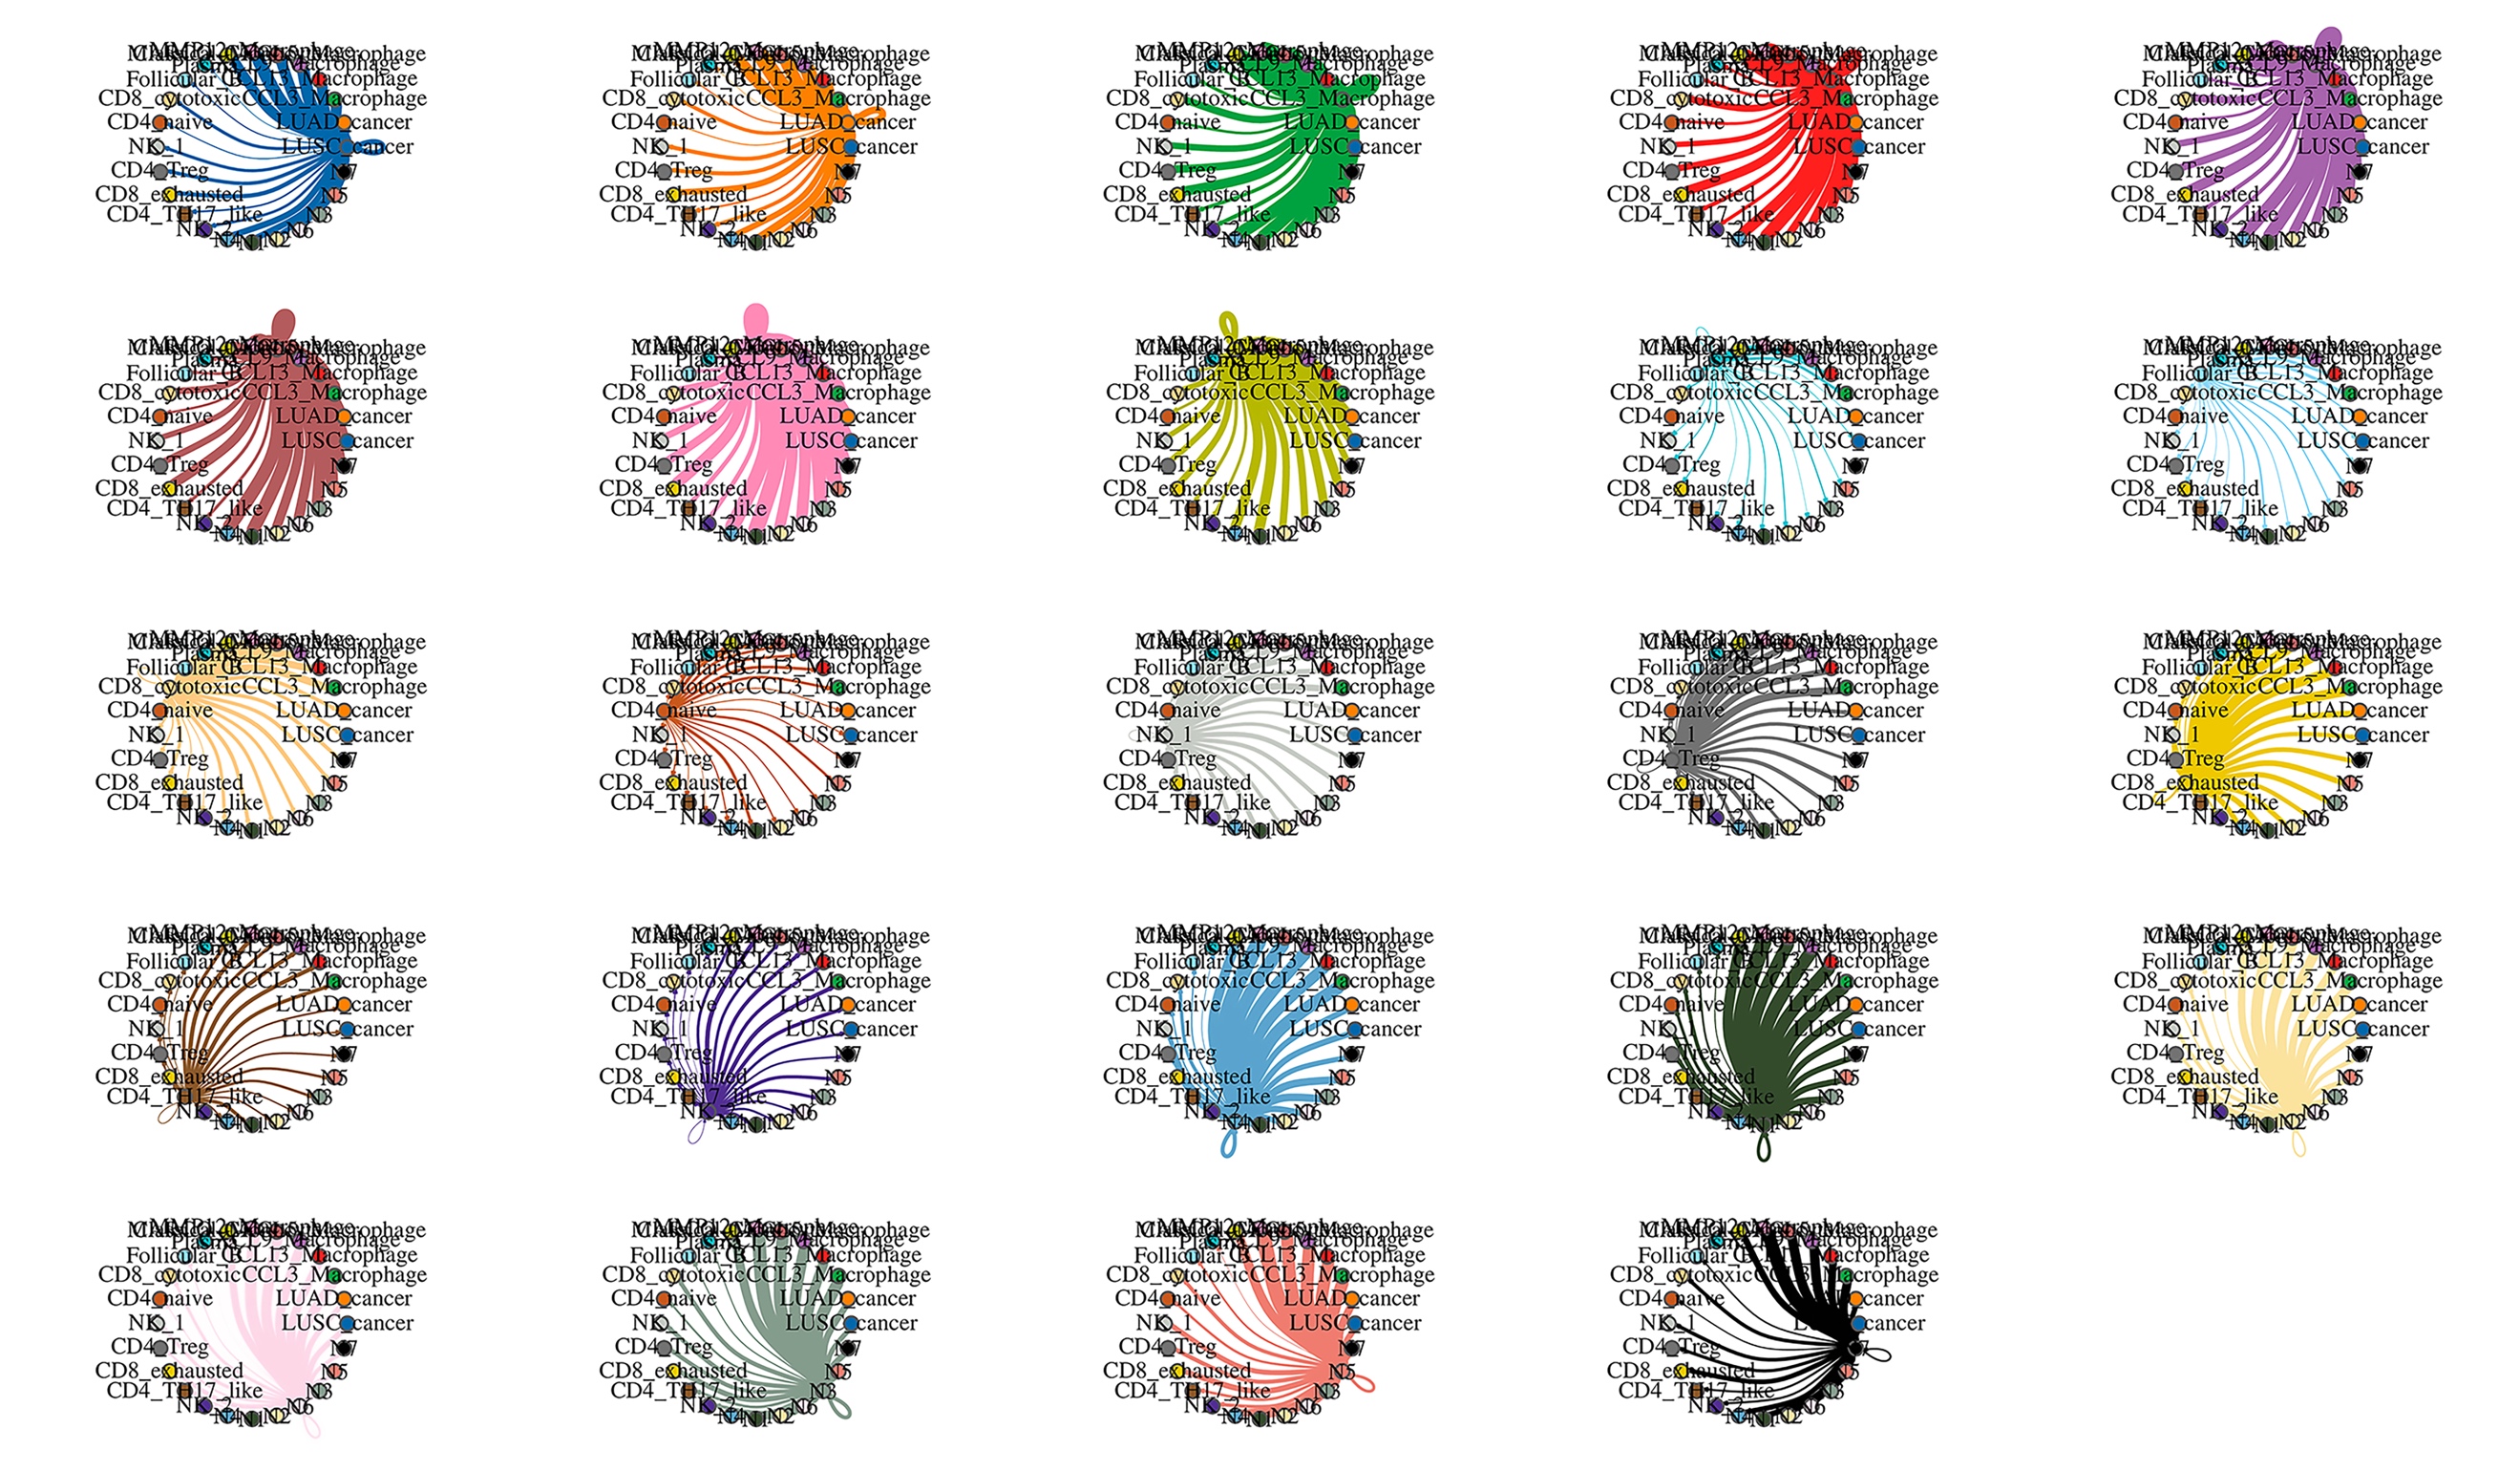


**Supplementary Figure 2** Cell interaction networks between each ligand cell and other receptor cells. Nodes represent types of ligand cells, and edge weights were calculated based on the number of interactions between two cell types. The colors of edges correspond to ligand cells.
